# Supplementary material
Source: Springer Nature journal article supplement (https://www.springermedizin.de/resource/supplementary/13049_2014_758_MOESM1_ESM.pdf/9667236)

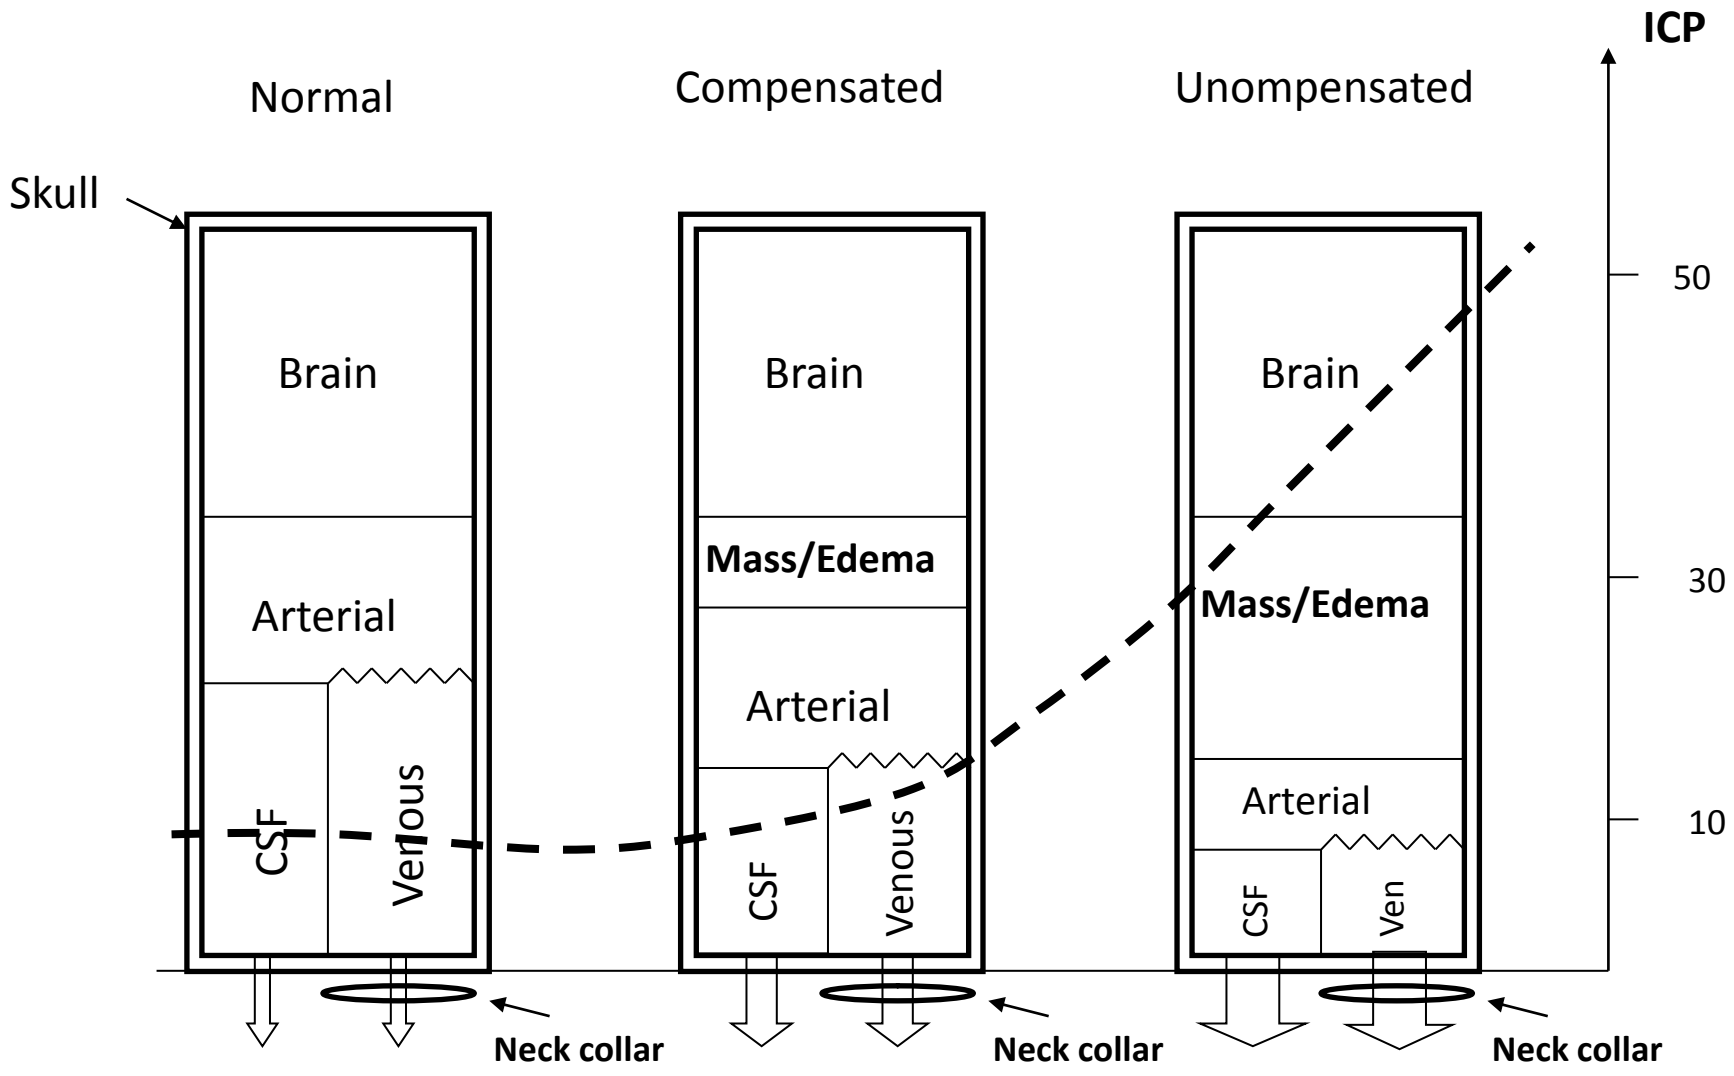

Supplement: MOESM1 [file 9667236]
